## TIME COURSE OF THE ESTABLISHMENT OF UTERINE SEAWATER CONDITIONS IN LATE-TERM PREGNANT SPINY DOGFISH (*SQUALUS ACANTHIAS*)

By GREGG A. KORMANIK

*Department of Biology, University of North Carolina at Asheville, Asheville, NC 28814, USA and the Mount Desert Island Biological Laboratory, Salsbury Cove, ME 04672, USA*

*Accepted 16 December 1987*

### Summary

The gestation period for embryos of the spiny dogfish, *Squalus acanthias* (L.) lasts for nearly 2 years. During the latter part of this period the pups remain in the uterus and the fluid surrounding the embryos resembles sea water with respect to the major ions, but is low in pH (approx. 6), high in partial pressure of carbon dioxide (approx. 3 mmHg; 1 mmHg = 133.3 Pa), low in total carbon dioxide content (approx. 0.2 mmol l<sup>-1</sup>), and may have a total ammonia concentration of up to 22 mmol l<sup>-1</sup>. Thus the conditions under which the pups complete their development *in utero* is quite remarkable.

The derivation of these conditions was examined in late-term pregnant females, from whose uterine horns the pups had been removed, by monitoring changes that occurred in instilled uterine sea water. The mother is responsible for reducing the pH, reducing the total carbon dioxide content and elevating the partial pressure of carbon dioxide to the levels observed in fresh-caught females, in less than 24 h. The ammonia concentration is also elevated, but this takes rather longer. The decreased pH is responsible for the accumulation of ammonia in the uterine sea water, and it also serves to protect the pups from the toxic effects of NH<sub>3</sub>, by converting it to the relatively non-toxic ionic form, NH<sub>4</sub><sup>+</sup>. The reasons for the establishment of these uterine seawater conditions are still not evident.

### Introduction

Spiny dogfish (*Squalus acanthias* L.) possess the rather unspecialized form of viviparity termed 'lecithotrophy' (Wourms, 1981). Fertilized eggs remain encapsulated for about 4–6 months *in utero*. The delicate egg case surrounding these 'candles' then ruptures, and the pups, which possess yolk sacs, complete their

Key words: dogfish embryos, acid–base, ammonia.

period of gestation which lasts nearly 2 years (Nammack, Musick & Colvocoresses, 1985; Woodhead, 1976). In the last 10–15 months of gestation these pups, numbering typically 2–6 per uterine horn, reside in a solution apparently derived from sea water (Evans, Oikari, Kormanik & Mansberger, 1982; Kormanik & Evans, 1986), and ventilate while *in utero* (G. A. Kormanik, personal observations). In fact, pups can be removed from the uterus and, if properly cared for, will survive indefinitely in sea water (Jones & Price, 1967; D. H. Evans, personal observations).

The lining of the uterus is thin in non-gravid females, but during pregnancy, becomes highly vascularized (Jollie & Jollie, 1967). The uterine artery increases in size to allow an increased flow of blood to the uterine horns (Fuller, Griendling & Kent, 1983). The high degree of vascularization and extensive blood flow have led several investigators (Burger, 1967; Jollie & Jollie, 1967; see also Wourms, 1981) to suggest that the uterine circulation might play some role in supplying O<sub>2</sub> and removing CO<sub>2</sub>, and thus aid the pups in respiration. In addition, Burger (1967) has reported that the uterine horns of the pregnant female are periodically flushed with sea water, presumably to aid the pups in respiration and the removal of waste products. The relative importance of the maternal circulation and seawater flushing of the uterus in maintenance of the pups' environment is not clear.

Although the major ion concentrations of the uterine sea water resemble normal sea water (Evans *et al.* 1982), the uterine sea water is relatively acid, with a pH of about 6. The total CO<sub>2</sub> content is only a few tenths of a mmol l<sup>-1</sup>, the partial pressure of CO<sub>2</sub> (P<sub>CO<sub>2</sub></sub>) is elevated to the level found in maternal blood and ammonia concentration is extremely high, approaching 22 mmol l<sup>-1</sup> (Kormanik & Evans, 1986). Thus it would appear that the uterine horns are not flushed with sea water as frequently as previous investigators have suggested (Burger, 1967). The pups appear to be in an environment which would normally be considered toxic to water-breathing organisms, yet they apparently thrive.

Neither the origins of these uterine conditions nor the reasons for their establishment are clear. For example, the acidity and ammonia may arise from the pups, since Kormanik & Evans (1984) have demonstrated that late-term pups show net excretions of ammonia and titrable acidity (G. A. Kormanik & D. H. Evans, unpublished observations). Alternatively, the pups may excrete ammonia, but the acidity may be derived from the mother, in order to convert the NH<sub>3</sub> into the relatively less toxic ionic form, NH<sub>4</sub><sup>+</sup> (see review by Colt & Armstrong, 1981). Lastly, the levels of ammonia and acidity in the uterine sea water may arise from both the mother and the pups. A first step in understanding the reason for these uterine conditions and their significance to the development of the pups is a determination of how they are derived. To examine the origin of these uterine seawater conditions as well as the time course of their establishment, we monitored the changes in concentration with time of several uterine seawater constituents in late-term pregnant female *Squalus acanthias* from which the pups had been removed. In addition, we determined the gradients developed from maternal blood to uterine sea water. In this manner, it was possible to examine the

contributions of the mother alone in establishing the uterine environment for the developing pups.

### **Materials and methods**

#### *Preparation of animals*

Pregnant female spiny dogfish (*Squalus acanthias*) were caught by gill nets from Frenchman Bay, and held in floating live cars for several days prior to use to allow them sufficient time to recuperate from the trauma of capture. The presence of late-term pups in the uterine horns was confirmed by digital examination. Prior to use in experiments, late-term females were removed from the live cars, and a small incision was made on the tip of the snout. The fish was then pithed by the insertion of a wire (approx. 1.5 mm × 1 m) through the incision into the brain and down the length of the spinal column. The wire was then manipulated to effect destruction of the nervous tissue. The fish was immediately immersed in sea water, and water forced over the gills until at least partial ventilation was re-established. This procedure was performed at the live car, and the fish was then immediately transferred to a running seawater holding tank where ventilation of the gills with fresh aerated sea water was commenced *via* intubation of the mouth and spiracles. In most experiments, spontaneous bilateral ventilation was re-established. In some of the experiments, ventilation was weak or absent on one side. In these animals, ventilation of the gills by intubation was maintained throughout the course of the experiment. The female was loosely strapped to an operating board, dorsal side down, and the head and body anterior to the cloaca were immersed in sea water ( $15 \pm 1^\circ\text{C}$ ). Running sea water was directed over the remaining exposed portions of the body to prevent drying and keep the exposed portion of the fish cool.

Both uterine horns were perfused with fresh aerated sea water to maintain the pups temporarily. A blood catheter (PE 60) was installed in the dorsal aorta of the tail of the mother using a Tuohy needle (17 gauge thin wall, Popper & Sons, NY). Tonus of the cloaca and uterine horns was sufficiently reduced after about 30 min that, when the uterine horns were filled with sea water and slight pressure was applied to the abdomen, the pups could be expressed alive and intact from the uteri. Removal of all the pups from the uteri was confirmed by digital examination and also by dissection of the females, all of which were killed at the termination of the experiments. Water-inflated balloons were installed in the intestine and openings to the uterine horns to block any flow of intestinal contents into the cloaca and prevent contamination of the uterine fluids. In most experiments, the urinary papilla was also catheterized to help prevent retrograde flow of urine into the cloaca. The experimental period was commenced when maternal blood pH (see below) was rising and approaching normal levels (approx. 7.7). This usually occurred a few hours after surgery. Data from females with abnormally low blood pH, which was taken to indicate a lack of recovery from the surgical procedures, were discarded.

At the start of the experiment, each uterine horn was rinsed several times and then filled with 120 ml of fresh aerated sea water, about the volume typically found in fresh-caught pregnant females (Kormanik & Evans, 1986). Seawater samples (2 ml) were removed from the uterine horns by suction using a large syringe and a blunt rubber catheter. The samples were analysed for total  $\text{CO}_2$  ( $T_{\text{CO}_2}$ ), pH and total ammonia ( $T_{\text{Amm}}$ ). Heparinized blood samples were removed from the female *via* the aortic catheter, and all samples were handled as previously described (Kormanik & Evans, 1986).

#### *Pup ammonia gradient experiments*

In this series of experiments the role of seawater acidity was assessed in protecting the pups from the build-up of ammonia in the uterine sea water. Late-term pups were collected from killed females and acclimated to fresh sea water for about 1 day prior to experiments. In the first series of experiments five pups (approx. 40 g each) were placed into 2 l of well-aerated sea water ( $15 \pm 2^\circ\text{C}$ ) that had been adjusted to a total ammonia concentration of  $10 \text{ mmol l}^{-1}$  (as the  $\text{Cl}^-$  salt), approximately the average concentration found in uterine sea water (see Kormanik & Evans, 1986). The pH was 8.14 at the start of the experimental period, similar to that of normal sea water (Kormanik & Evans, 1986). Heparinized blood samples were taken from the pups by ventral puncture of the dorsal aorta in the tail region at 3, 16 and 42 h. After the 16 h sample, the sea water was replaced with a fresh solution at  $10 \text{ mmol l}^{-1}$  total ammonia, and a pH of 8.2. In a second series of experiments, pups were set up as before, but were exposed to sea water with ammonia at  $10 \text{ mmol l}^{-1}$  with the pH adjusted to less than 5 with HCl. It was necessary manually to add more acid every few hours to keep the pH low and in the established range. Over one night the pH increased to 5.5 and was then maintained at that level for the duration of the experiment. Although this manual method of pH maintenance was rather crude, the pH of the seawater bath was nevertheless maintained slightly below that found normally in the uterine horns, for the duration of these experiments. Blood and seawater pH, and ammonia levels in sea water were determined as described below.  $\text{NH}_4^+$  concentration and the partial pressure of ammonia ( $P_{\text{NH}_3}$ ) were calculated from total ammonia concentration and pH for blood and sea water using the Henderson–Hasselbalch equation (see Kormanik & Cameron, 1981) and values for  $\text{pK}'$  and blood and seawater solubility from Cameron & Heisler (1983). Since the blood pH could not be measured in all pups at all times, due in part to their small size and a desire not to disturb them too much during the course of the experiment, an average value was determined ( $= 7.8$ ), and was used in the gradient calculations.

#### *Analyses of samples*

Total  $\text{CO}_2$  levels in sea water and blood plasma were determined using a Capnicon II (Cameron Instrument Co.). The pH values of blood and sea water were determined using an IL Micro 13 (Instrumentation Laboratories) and a Orion 601A, with electrodes thermostatted to  $15^\circ\text{C}$ .

Ammonia in sea water was analysed using the phenol–hypochlorite assay (Solorzano, 1969), and in blood plasma using an ammonia-specific enzymatic assay (kit no. 170-UV, Sigma Chemical Co.).

Lactate was analysed in uterine seawater samples by a modification of a standard method used for plasma (kit no. 826-UV, Sigma Chemical Co.). Uterine seawater samples were removed from pregnant females and analysed immediately for lactate. 0.5 ml of uterine sea water was added directly to 2 ml of the reaction mixture. These unknowns were measured against a standard curve made up from a set of standards with 0.5 ml of fresh sea water added to each reaction mixture. The addition of an equivalent amount of fresh sea water to the standards eliminated any possible error contributed by using uterine sea water instead of plasma in this assay.

#### Calculations

The  $P_{\text{CO}_2}$  in the seawater samples was calculated from the Henderson–Hasselbalch equation, using the values we determined for pH and  $T_{\text{CO}_2}$ , and the appropriate values for  $\text{CO}_2$  solubility and ‘apparent’  $pK'$  for sea water calculated using the empirically established polynomials of Boutilier, Heming & Iwama (1984).  $P_{\text{CO}_2}$  values for blood were calculated in a similar manner, from the  $T_{\text{CO}_2}$  and pH we had determined. Values for apparent  $pK'$  and  $\text{CO}_2$  solubility were calculated for elasmobranch blood from the data of Albers & Pleschka (1967), Albers (1970) and Pleschka & Wittenbrock (1971), again using the empirically established polynomials of Boutilier *et al.* (1984). Temperature of the sea water measured during the experiments and used in the calculations was  $15 \pm 1^\circ\text{C}$ . Student’s *t*-test was used in the statistical comparisons, for paired and unpaired data, where appropriate.

#### Results

The results of the determinations made for maternal blood and uterine seawater pH and  $P_{\text{CO}_2}$  are presented in Fig. 1A. Maternal blood pH was relatively stable throughout the course of the experiments, increasing slightly with time in the first 30 h and then stabilizing for the remainder of the experiment (30–80 h) at a pH of  $7.81 \pm 0.01$  ( $N = 17$ , Fig. 1A). The surgical procedures used in this investigation allowed for a relatively rapid return of the fish to normal blood pH values and most experiments could be started within a few to 24 h after surgery. Thus the females were stable with respect to acid–base status throughout the course of the experimental period, and yielded blood values similar to those of intact, rested fish at  $15^\circ\text{C}$  (see Heisler, Neumann & Holeton, 1980). Most fish remained in stable acid–base status beyond 48 h, and three fish lasted over 80 h under this experimental protocol. Uterine seawater values are not as complete, however, since females occasionally ejected the sea water.

The values determined for uterine sea water pH are also shown in Fig. 1A. Uterine seawater pH declined from normal seawater pH values (approx. 8.2) to

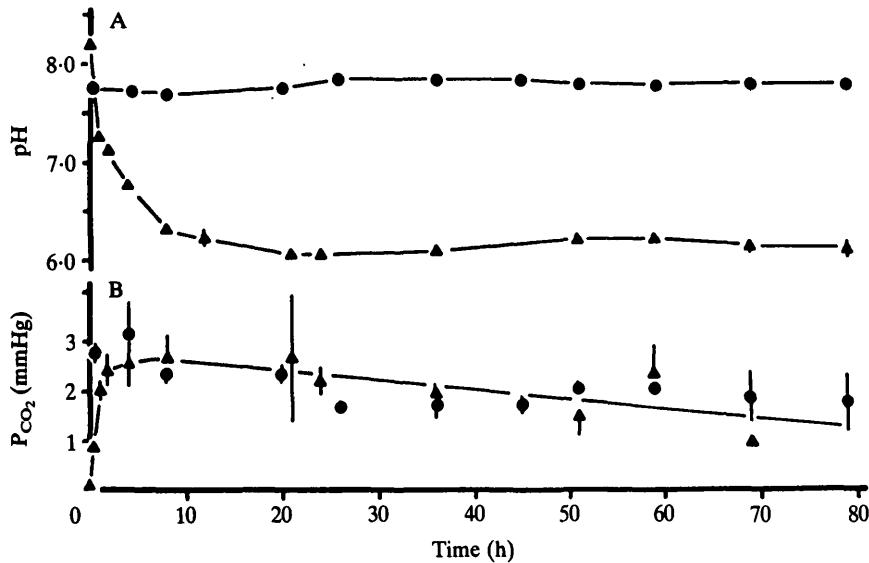

Fig. 1. Changes in pH (A) and partial pressure of CO<sub>2</sub> (P<sub>CO<sub>2</sub></sub>) (B) of the blood (filled circles) and uterine sea water (filled triangles) of late-term pregnant females. Vertical bars (in some cases obscured by the symbol) indicate s.e.  $N = 2-12$ .

about 6 in the first 20 h, and remained at about that level for the duration of the experiment. Maternal blood T<sub>CO<sub>2</sub></sub> (not shown) was determined in these experiments at the sampling times indicated for the pH, and blood P<sub>CO<sub>2</sub></sub> was calculated as described above. These values are reported in Fig. 1B. Blood P<sub>CO<sub>2</sub></sub> declined slowly during the course of the experiment, from slightly over 3 mmHg to about 2 mmHg at 80 h. Although the values for maternal blood P<sub>CO<sub>2</sub></sub> determined at the beginning of the experiments are slightly elevated over those for well-rested fish (approx. 2 mmHg), more typical values were achieved after about 48 h. These data indicate that ventilation of the mother's gills, whether spontaneous or aided by forced seawater flow, was sufficient to alleviate build-up of respiratory CO<sub>2</sub> and a stable respiratory status of the females under our experimental protocol was achieved. Uterine seawater P<sub>CO<sub>2</sub></sub> was also calculated, from the uterine seawater pH determined (Fig. 1A) and the T<sub>CO<sub>2</sub></sub> values measured (Fig. 3). These values of P<sub>CO<sub>2</sub></sub> for uterine sea water are also presented in Fig. 1B. The P<sub>CO<sub>2</sub></sub> of the uterine sea water increased rapidly from the values for sea water equilibrated with atmospheric P<sub>CO<sub>2</sub></sub> and instilled in the uterine horns (approx. 0.2 mmHg) to nearly 3 mmHg within the first few hours. Thus uterine seawater P<sub>CO<sub>2</sub></sub> rapidly reached equilibrium with the P<sub>CO<sub>2</sub></sub> of the blood, and by the 8 h samples, they were not significantly different ( $P > 0.1$ ). After the attainment of equilibrium, both blood P<sub>CO<sub>2</sub></sub> and uterine seawater P<sub>CO<sub>2</sub></sub> then declined with time. The P<sub>CO<sub>2</sub></sub> of the uterine sea water therefore appears to 'track' values for blood P<sub>CO<sub>2</sub></sub>, a further indication that equilibrium between the two fluid compartments had been achieved.

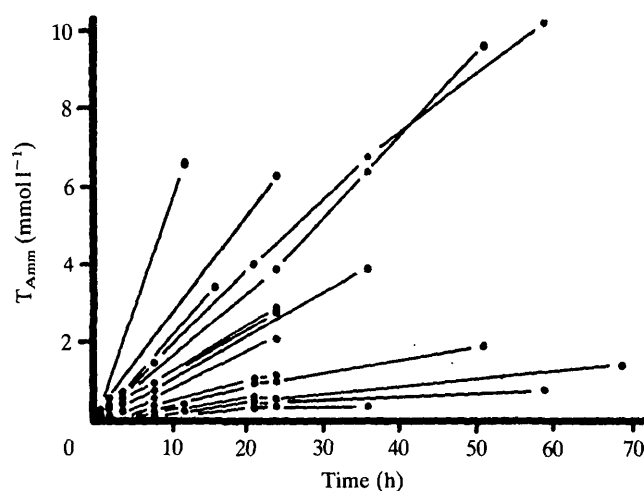

Fig. 2. Changes in total ammonia concentration ( $T_{\text{Amm}}$ ) with time in the uterine sea water of late-term pregnant females. Individual determinations are indicated.

Uterine seawater total ammonia ( $T_{\text{Amm}}$ ) is shown in Fig. 2. The rates of increase in the uterine ammonia concentration observed were highly variable, but in all determinations increased with time and, during the course of this investigation, approached values of over  $10 \text{ mmol l}^{-1}$ . At the 24 h sampling time, the average total ammonia concentration of the uterine sea water was  $2.1 \pm 0.6 \text{ mmol l}^{-1}$  ( $N = 10$ ), or about 20% of the average value ( $10 \text{ mmol l}^{-1}$ ) we observed in fresh-caught late-term pregnant females (Kormanik & Evans, 1986). Two fish reached about  $10 \text{ mmol l}^{-1}$  ammonia at about 50 h, indicating that the average ammonia levels we observed in fresh-caught pregnant females can be achieved in little more than 2 days.

Changes occurring in the uterine seawater  $T_{\text{CO}_2}$  are reported in Fig. 3. The values determined for  $T_{\text{CO}_2}$  in the uterine sea water declined with time, and by the twelfth hour achieved a level of about  $0.2 \text{ mmol l}^{-1}$  and remained there for the duration of the experiment (Fig. 3). At this  $P_{\text{CO}_2}$  (about  $2.5 \text{ mmHg}$ , see Fig. 1B), the dissolved  $\text{CO}_2$  ( $0.052 \text{ mmol l}^{-1} \text{ mmHg}^{-1} \times 2.5 \text{ mmHg} = 0.13 \text{ mmol l}^{-1}$ ) represents a substantial portion of the  $T_{\text{CO}_2}$ , thus the bicarbonate concentration of the uterine sea water had been reduced to less than  $0.1 \text{ mmol l}^{-1}$  ( $0.2 \text{ mmol l}^{-1} T_{\text{CO}_2}$  minus  $0.13 \text{ mmol l}^{-1}$  dissolved  $\text{CO}_2$ ).

To determine if the decline in the observed pH of uterine sea water might be attributable to the secretion of lactic acid, a common organic metabolite, a few analyses were made for lactate. Uterine seawater samples were removed both from late-term females which were being held in the live cars (conditions comparable to those reported by Kormanik & Evans, 1986) and from the experiments described above. The results are reported in Table 1. Lactate levels in the uterine sea water of the females from the live car, although quite low, are more than double that of the females which had lasted the longest in our experiments

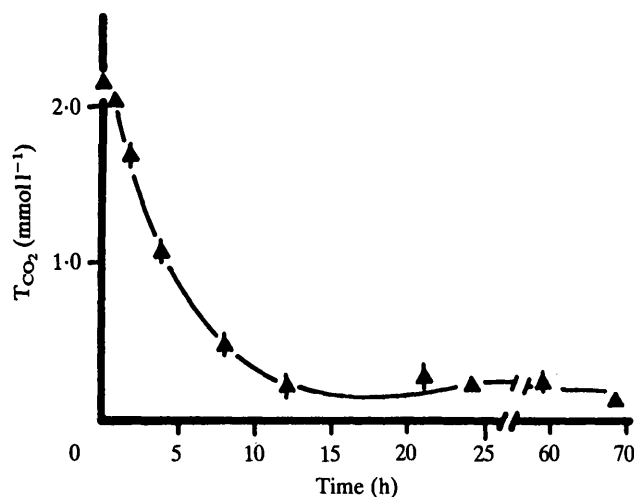

Fig. 3. Changes in the total CO<sub>2</sub> content (T<sub>CO<sub>2</sub></sub>) with time in the uterine sea water of late-term pregnant females from which the pups had been removed. Vertical bars indicate s.e.  $N = 2-12$ .

Table 1. Lactate concentrations in uterine sea water of fresh-caught late term *Squalus acanthias* females (with late-term pups residing in the uterine horns) removed from the live car

|                                    | Live car     | Experimental<br>(at 75-80 h) |
|------------------------------------|--------------|------------------------------|
| Lactate ( $\mu\text{mol l}^{-1}$ ) | $116 \pm 16$ | $48 \pm 6$                   |
| $N$                                | 3            | 3                            |
| Significance                       |              | $P < 0.01$                   |

Values are compared to pithed experimental females (without pups, as described in the text) near the end of the experimental period.

(i.e. 75-80 h). The difference is significant for these unpaired data. However, a reduction of uterine  $\text{HCO}_3^-$  concentration by nearly  $2 \text{ mmol l}^{-1}$ , as demonstrated in Fig. 3, would require an equivalent proton secretion of nearly  $2 \text{ mmol l}^{-1}$  to titrate the  $\text{HCO}_3^-$  of the uterine sea water one for one, with concomitant resorption of the  $\text{CO}_2$  generated across the uterine epithelium. Thus, even if the appearance of lactate, as determined by this assay, represents the net secretion of lactic acid into the uterine sea water (the secretion of the lactate ion by itself would not affect pH), the amount would be quite inadequate to account for the decreased pH observed in this investigation.

To determine the role of this maternally derived acidity in protecting the pups from the potential toxicity of the high levels of ammonia observed in uterine sea water, pups were exposed to high ammonia concentrations in sea water at both low



Table 2. *The effect of high ammonia level, normal pH (8.1–8.2) sea water on blood ammonia in pre-natal dogfish pups*

|                                                      | 3 h          | 16 h             | 42 h             |
|------------------------------------------------------|--------------|------------------|------------------|
| Blood ammonia (mmol l <sup>-1</sup> )                | 1.25 ± 0.33  | 2.32 ± 0.28      | 5.17 ± 0.29      |
| N                                                    | 5            | 5                | 3†               |
| Significance                                         |              | <i>P</i> < 0.001 | <i>P</i> < 0.001 |
| Ammonia gradients (blood–sea water)                  |              |                  |                  |
| NH <sub>4</sub> <sup>+</sup> (mmol l <sup>-1</sup> ) | -8.51 ± 0.32 | -7.39 ± 0.28     | -4.58 ± 0.29     |
| Significance                                         |              | <i>P</i> < 0.01  | <i>P</i> < 0.001 |
| P <sub>NH<sub>3</sub></sub> (nmHg)*                  | -4860 ± 100  | -5850 ± 80       | -5000 ± 90       |
| Significance                                         |              | <i>P</i> < 0.001 | <i>P</i> < 0.001 |
| N                                                    | 5            | 5                | 3†               |

Significance denotes a comparison with the previous time period (mean ± s.e.).

\* nmHg = μTorr.

† Two pups died during the night.

Table 3. *The effect of high external ammonia level and low pH on blood ammonia in pre-natal dogfish pups*

|                                                      | 3 h                   | 16 h                  | 42 h           |
|------------------------------------------------------|-----------------------|-----------------------|----------------|
| Blood ammonia (mmol l <sup>-1</sup> )                | 0.38 ± 0.14           | 0.20 ± 0.15           | 0.43 ± 0.22    |
| Significance                                         |                       | <i>P</i> > 0.1        | <i>P</i> > 0.1 |
| Seawater pH range                                    | [-----4.1 ± 0.1-----] | [-----5.5 ± 0.2-----] |                |
| Ammonia gradients (blood–sea water)                  |                       |                       |                |
| NH <sub>4</sub> <sup>+</sup> (mmol l <sup>-1</sup> ) | -9.23 ± 0.13          | -9.80 ± 0.14          | -9.58 ± 0.22   |
| Significance                                         |                       | <i>P</i> < 0.01       | <i>P</i> > 0.1 |
| P <sub>NH<sub>3</sub></sub> (nmHg)*                  | +111 ± 40             | +48 ± 43              | +114 ± 65      |
| Significance                                         |                       | <i>P</i> > 0.1        | <i>P</i> > 0.1 |

Significance denotes a comparison with the previous time period, (mean ± s.e.). *N* = 5–6.

\* nmHg = μTorr.

(approx. 5) and normal (approx. 8.1) seawater pH. The results are presented in Tables 2 and 3. Blood ammonia in pups exposed to high ammonia, normal pH sea water increased rapidly by several-fold throughout the course of the experiment and, since two of the five pups died, approached presumably lethal levels even before the last sampling period (Table 2). In all cases, very large gradients for both NH<sub>4</sub><sup>+</sup> and P<sub>NH<sub>3</sub></sub> were directed from sea water to the blood of the pups, and resulted in a large increase in pup blood ammonia concentration. The results from a second series of experiments, in which the pups were exposed to a similar seawater ammonia concentration (10 mmol l<sup>-1</sup>), but with the pH adjusted to about 5, are presented in Table 3. Manual maintenance of a stable low pH was rather difficult

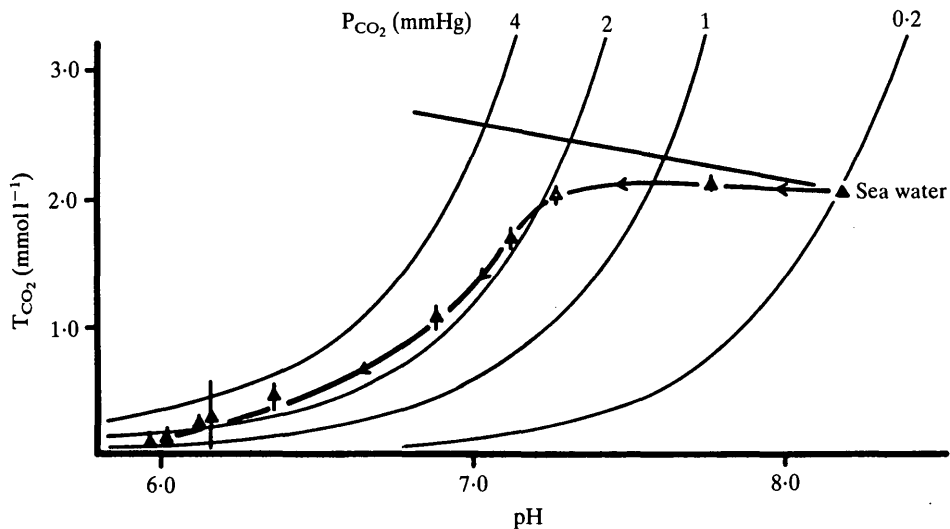

Fig. 4. Total  $\text{CO}_2$  content ( $T_{\text{CO}_2}$ ) and pH diagram for uterine sea water (filled triangles), with  $P_{\text{CO}_2}$  isobars for  $P_{\text{CO}_2} = 4, 2, 1$  and  $0.2$  mmHg. Arrows indicate the direction of change with time. Vertical bars indicate s.e.  $T_{\text{CO}_2}$  is expressed in  $\text{mmol l}^{-1}$ .  $N = 2-12$ .

and accounts for the variations in pH shown. Nevertheless, during the course of this experiment, the pH was kept below levels normally seen in the uterine sea water (approx. 6, this report). With the reduced seawater pH, the  $P_{\text{NH}_3}$  gradient remained directed from blood to sea water throughout the course of this experiment, and the  $\text{NH}_4^+$  gradient remained directed from sea water to blood. In these two experiments, then, only the direction of the  $P_{\text{NH}_3}$  gradient was changed while the  $\text{NH}_4^+$  gradient always remained directed from the seawater bath to the blood. Thus, in spite of the fact that the total ammonia gradient (predominantly in the form of the ion,  $\text{NH}_4^+$ ) was directed from sea water to blood by nearly  $10 \text{ mmol l}^{-1}$  (Table 3), the blood ammonia concentration remained at levels typical of pups adapted to fresh sea water.

### Discussion

These preliminary data provide some insight into the changes that occur in the uterine sea water of late-term pregnant female *S. acanthias* in the absence of pups, and thus represent the contributions of the mother in establishing the uterine seawater environment.

The total  $\text{CO}_2$  content of uterine sea water and the pH are actively reduced with time. To examine more carefully the relationship between the changes in pH,  $T_{\text{CO}_2}$  and  $P_{\text{CO}_2}$  of the uterine sea water, a total  $\text{CO}_2$ -pH diagram was constructed (Fig. 4). Seawater  $P_{\text{CO}_2}$  isopleths are presented ranging from atmospheric (approx.  $0.2$  mmHg, the  $P_{\text{CO}_2}$  of the sea water instilled into the uterine horns) to  $4$  mmHg. The seawater buffer curve shown (solid line) was determined by measuring the pH

and  $T_{\text{CO}_2}$  of fresh sea water equilibrated to known 1%  $\text{CO}_2$  standards ( $P_{\text{CO}_2} = 7.2 \text{ mmHg}$ ) in air. A seawater buffer curve was used since fresh sea water was instilled into the uterine horns during these experiments. Although the buffer curve of the uterine sea water can be expected to change slightly with time due to the removal of  $\text{HCO}_3^-$  by the mother, the addition of ammonia had a minimal effect (data not shown). These changes were disregarded for the following analysis.

At first the uterine seawater  $T_{\text{CO}_2}$  increased very slightly as the uterine seawater  $P_{\text{CO}_2}$  increased and the pH decreased. However, since the measured curve showed an increasing deviation from the buffer line, the  $T_{\text{CO}_2}$  was declining as the pH continued to decline. The declining  $T_{\text{CO}_2}$  then followed the  $P_{\text{CO}_2}$  isopleth for the blood at slightly more than 2 mmHg until it reached its lowest value at a pH slightly below 6 and  $P_{\text{CO}_2}$  somewhat below 2 mmHg (see also Fig. 1B). Recall that during this time period, the  $P_{\text{CO}_2}$  of the blood, as well as the uterine sea water, was declining from slightly more than to slightly less than 2 mmHg. This rapid decline in  $T_{\text{CO}_2}$ , which is predominantly a decline in the  $\text{HCO}_3^-$  concentration of the uterine sea water, is especially interesting. For a passively buffered system such as sea water (solid line in Fig. 4), one would expect to see a slight increase in the  $T_{\text{CO}_2}$  along the seawater buffer curve as the  $P_{\text{CO}_2}$  increases, with a concomitant decrease in pH. The increase in  $T_{\text{CO}_2}$  one expects with increasing  $P_{\text{CO}_2}$  would be due both to an increase in  $\text{HCO}_3^-$  and to an increase in dissolved  $\text{CO}_2$ , as predicted by the Henderson–Hasselbalch equation and solubility calculations. Thus the decrease in  $T_{\text{CO}_2}$  we observed simultaneously with an increasing  $P_{\text{CO}_2}$  and decreasing pH, suggests that the total  $\text{CO}_2$  is reduced by extraction of  $\text{CO}_2$  from the uterine sea water.

This rapid reduction of  $T_{\text{CO}_2}$  and decline in pH may be the result of either the active resorption of  $\text{HCO}_3^-$  (or  $\text{OH}^-$ ) from the sea water in the uterine horns or the excretion of protons into the uterine sea water, with the concomitant resorption of  $\text{HCO}_3^-$  occurring by the diffusion of  $\text{CO}_2$  gas across the uterine epithelium into the blood. If the latter is the case, the appearance of protons in the sea water would certainly not appear to be due to the secretion of lactic acid, since the concentrations of the lactate ion which were determined in the uterine sea water are very low (Table 1). Given these kinds of data, that is, measured changes in the pH, total ammonia and  $\text{CO}_2$  content, it is impossible to distinguish among the alternatives (see Cameron, 1984, for a discussion). A more precise determination of the ion species moved and the manner by which transport occurs (i.e.  $\text{Cl}^-/\text{HCO}_3^-$  or  $\text{Na}^+/\text{H}^+$  exchange, etc.) requires a more sophisticated analysis. Nevertheless, the reductions observed in both pH and  $T_{\text{CO}_2}$  are related at least stoichiometrically by the Henderson–Hasselbalch equation, and are probably related mechanistically in the establishment of the uterine seawater conditions we observed in experimental as well as the fresh-caught animals.

The increase in ammonia concentration seen in the uterine sea water may be secondary to this reduction in pH and the resulting  $P_{\text{NH}_3}$  gradient established from the blood of the mother to the uterine sea water. Ammonia would diffuse from the blood of the mother to the uterine sea water in the form of  $\text{NH}_3$ . Substantial  $P_{\text{NH}_3}$

gradients of about 3 to 1 from maternal blood to uterine sea water are still present at pH 6, even when the uterine seawater  $T_{\text{Amm}}$  approaches  $10 \text{ mmol l}^{-1}$  (Kormanik & Evans, 1986). Therefore, it is not necessary to postulate any active process for ammonia excretion into the uterine sea water, such as the excretion of  $\text{NH}_4^+$ , but such a process cannot be ruled out at this time.

The rate of increase of the ammonia concentration in the uterine seawater is far slower than the decrease in either  $T_{\text{CO}_2}$  or pH we observed in these experiments. To approach the levels of total ammonia we observed in fresh-captured females of up to  $22 \text{ mmol l}^{-1}$  ammonia (average =  $10 \text{ mmol l}^{-1}$ , Kormanik & Evans, 1986) might take nearly a week. Only a few of our females had uterine sea water ammonia concentrations approaching  $10 \text{ mmol l}^{-1}$  even after 2–3 days, and in the absence of any uterine flushing, since the latter was prevented by our experimental protocol. This period may be slightly overestimated, since the presence of pups in the uterine sea water would probably increase the rate of appearance of ammonia in uterine sea water (Kormanik & Evans, 1984). Nevertheless, incomplete uterine flushing *in situ* would certainly serve to increase the time it takes for the ammonia concentration to build up, and frequent flushing would prevent the build-up of ammonia (and acidity as well).

The experiments where pups were placed in high ( $10 \text{ mmol l}^{-1}$ ) ammonia sea water are especially interesting regarding the role of a low uterine seawater pH. In both series of experiments, the total ammonia concentration was the same, but the direction of the  $P_{\text{NH}_3}$  gradient was varied by adjusting the pH. The data in Tables 2 and 3 are in sharp contrast and are instructive on two points. First, high blood levels of ammonia appear to be toxic to the pups, presumably due to the elevated levels of  $\text{NH}_3$  and/or  $\text{NH}_4^+$  of the blood. Thus, the acidification of the uterine sea water by the mother that we observed would serve to protect the developing pups from increases in blood ammonia in the high ammonia uterine seawater environment, by maintaining a  $P_{\text{NH}_3}$  gradient directed from the blood to the uterine sea water. Second, ammonia movement appears mostly to follow the  $P_{\text{NH}_3}$  gradient, which suggests a predominance of  $\text{NH}_3$  diffusion. Thus ammonia excretion by the pups can be maintained in the face of a steep total ammonia gradient if the  $P_{\text{NH}_3}$  gradient is directed from blood to sea water, regardless of the  $\text{NH}_4^+$  gradient, at least in these experiments. These data support the suggestion that, at least in this elasmobranch, ammonia moves predominantly in the form of  $\text{NH}_3$  and that the gills of the pups as well as the uterine epithelium of the mother are relatively impermeable to  $\text{NH}_4^+$  (Cameron, 1986; Kormanik & Cameron, 1981; Kormanik & Evans, 1986).

These data certainly indicate that the uterine conditions we observed in fresh-caught, late-term pregnant females, that is low pH, low  $\text{CO}_2$  content and high ammonia concentration (Kormanik & Evans, 1986), can occur where uterine flushing is prevented even in the absence of pups. The decline in pH and total  $\text{CO}_2$  content in freshly introduced uterine sea water occurs rather rapidly, and ammonia builds up rather more slowly. While the acidity detoxifies ammonia, also promotes its accumulation and thus establishes a rather circular argument.

The central question then, still remains. Why are these conditions established in the first place, when it would appear to be relatively easy for the mother to flush the uterine horns periodically with fresh sea water as Burger (1967) suggested? One possible explanation is that longer retention of uterine sea water should help to reduce exposure of the developing pups to seawater-borne pathogens. The retention of uterine sea water can occur for longer intervals only if the ammonia which accumulates is detoxified by acidification. However, the results presented here demonstrate that the major source of ammonia in the uterine sea water is the mother. Therefore, a second possibility is that the uterine ammonia may act as a source of nitrogen for the pups developing *in utero*. This is currently under investigation in our laboratory.

Supported by NSFDCB-850251 and a UNCA intramural grant to GAK; NSFBSR 81-00823 to the Mount Desert Island Biological Laboratory. The technical assistance of William Kremer and Marilyn Patton is gratefully acknowledged and discussions concerning this work, with Drs J. N. Cameron, J. B. Claiborne and D. H. Evans, very much appreciated. Some of these data have been previously published in abstract form in the *Bulletin of the Mount Desert Island Biological Laboratory*.

#### References

- ALBERS, C. (1970). Acid-base balance. In *Fish Physiology*, vol. IV (ed. W. S. Hoar & D. J. Randall), pp. 173–208. New York: Academic Press.
- ALBERS, C. & PLESCHKA, K. (1967). Effect of temperature on CO<sub>2</sub> transport in elasmobranch blood. *Respir. Physiol.* **2**, 261–273.
- BOUTILIER, G., HEMING, T. A. & IWAMA, G. K. (1984). Appendix: physicochemical parameters for use in fish respiratory physiology. In *Fish Physiology*, vol. XA (ed. W. S. Hoar & D. J. Randall), pp. 403–430. New York: Academic Press.
- BURGER, J. W. (1967). Problems in the electrolyte economy of the spiny dogfish, *Squalus acanthias*. In *Sharks, Skates and Rays* (ed. P. W. Gilbert, R. F. Matheson & D. Rall), pp. 177–185. Baltimore: Johns Hopkins University Press.
- CAMERON, J. N. (1984). Acid-base status of fish at different temperatures. *Am. J. Physiol.* **246**, R452–R459.
- CAMERON, J. N. (1986). Responses to reversed NH<sub>3</sub> and NH<sub>4</sub><sup>+</sup> gradients in a teleost (*Ictalurus punctatus*), an elasmobranch (*Raja erinacea*), and a crustacean (*Callinectes sapidus*): Evidence for NH<sub>4</sub><sup>+</sup>/H<sup>+</sup> exchange in the teleost and the elasmobranch. *J. exp. Zool.* **239**, 183–195.
- CAMERON, J. N. & HEISLER, N. (1983). Studies of ammonia in the rainbow trout: physicochemical parameters, acid-base behaviour and respiratory clearance. *J. exp. Biol.* **105**, 107–125.
- COLT, J. E. & ARMSTRONG, D. A. (1981). Nitrogen toxicity to crustaceans, fish and molluscs. In *Bio-Engineering Symposium for Fish Culture*. FCS Publ. **1**, 34–47.
- EVANS, D. H., OIKARI, A., KORMANIK, G. A. & MANSBERGER, L. (1982). Osmoregulation by the prenatal spiny dogfish, *Squalus acanthias*. *J. exp. Biol.* **101**, 295–305.
- FULLER, E. O., GRIENGLING, K. K. & KENT, B. (1983). Mechanisms and biochemistry of arterial segments from the pregnant dogfish. *Bull. Mt Desert Isl. Biol. Lab.* **23**, 19–22.
- HEISLER, N., NEUMANN, P. & HOLETON, G. F. (1980). Mechanisms of acid-base adjustment in dogfish (*Scyliorhinus stellaris*) subjected to long-term temperature acclimation. *J. exp. Biol.* **85**, 89–98.

- JOLLIE, W. P. & JOLLIE, L. G. (1967). Electron microscopic observations on accommodations to pregnancy in the uterus of the spiny dogfish, *Squalus acanthias*. *J. Ultrastruct. Res.* **20**, 161–178.
- JONES, T. R. & PRICE, K. S., JR (1967). A method for maintaining spiny dogfish, *Squalus acanthias*, pups artificially. *Copeia* **2**, 471–472.
- KORMANIK, G. A. & CAMERON, J. N. (1981). Ammonia excretion in animals that breathe water: A review. *Mar. Biol. Letts* **2**, 11–23.
- KORMANIK, G. A. & EVANS, D. H. (1984). Characteristics of the uterine environment for late gestation pups of the dogfish, *Squalus acanthias*. *Bull. Mt Desert Isl. biol. Lab.* **24**, 26–29.
- KORMANIK, G. A. & EVANS, D. H. (1986). The acid–base status of prenatal pups of the dogfish, *Squalus acanthias*, in the uterine environment. *J. exp. Biol.* **125**, 173–179.
- NAMMACK, M. F., MUSICK, J. A. & COLVOCORESSES, J. A. (1985). Life history of spiny dogfish off the northeastern United States. *Trans. Am. Fish. Soc.* **114**, 367–376.
- PLESCHKA, K. & WITTENBROCK, I. (1971). The solubility of carbon dioxide in elasmobranch plasma between 10°C and 22°C. *Pflügers Arch. ges. Physiol.* **329**, 186–190.
- SOLORZANO, L. (1969). Determination of ammonia in natural waters by the phenolhypochlorite method. *Limnol. Oceanogr.* **14**, 799–801.
- WOODHEAD, A. D. (1976). Reproductive ecology of spiny dogfish, *Squalus acanthias*. *Bull. Mt Desert Isl. biol. Lab.* **16**, 103–106.
- WOURMS, J. P. (1981). Viviparity: The maternal–fetal relationship in fishes. *Am. Zool.* **21**, 473–515.
